# Supplementary material for: Safety evaluation of four faba bean extracts used as dietary supplements in grass carp culture based on hematological indices, hepatopancreatic function and nutritional condition
Source: PeerJ. 2020 Jul 7;8:e9516. doi: 10.7717/peerj.9516 (PMC7350914; doi:10.7717/peerj.9516)
Supplement: Supplemental Information 1 [file peerj-08-9516-s001.xlsx]

## Sheet: raw data_Figure1
	TC (mmol/L)		TG (mmol/L)		HDL-C (mmol/L)		LDL-C (mmol/L)
	50 d	100 d	50 d	100 d	50 d	100 d	50 d	100 d
Control_1	5.09	5.58	3.88	8.74	1.68	1.86	0.7	2.15
Control_2	4.99	5.6	3.86	8.83	1.65	1.89	0.71	2.2
Control_3	5.08	5.57	3.92	8.8	1.6	1.9	0.68	2.18
FB_1	4.65	6.26	2.52	4.98	1.26	1.72	0.83	2.61
FB_2	4.76	6.27	2.46	4.96	1.25	1.75	0.78	2.63
FB_3	4.7	6.3	2.43	4.95	1.27	1.77	0.8	2.53
FBA_1	3.64	4.99	2.4	8.82	1.1	1.99	0.39	1.92
FBA_2	3.63	5.02	2.52	8.73	1.09	2.02	0.42	1.88
FBA_3	3.61	4.96	2.47	8.84	1.07	1.97	0.46	1.91
FBW_1	4.6	4.54	2.5	9.43	1.34	2.23	0.78	1.55
FBW_2	4.56	4.46	2.46	9.45	1.29	2.24	0.82	1.6
FBW_3	4.58	4.53	2.54	9.39	1.32	2.26	0.79	1.57
FBP_1	4.31	3.6	2.6	7.46	0.95	2.33	0.39	1.21
FBP_2	4.35	3.59	2.54	7.45	0.93	2.36	0.45	1.23
FBP_3	4.32	3.63	2.57	7.48	0.96	2.31	0.43	1.2
FBR_1	2.39	4.12	1.03	4.93	0.81	1.76	0.25	1.4
FBR_2	2.37	4.14	1.03	4.99	0.82	1.73	0.27	1.46
FBR_3	2.39	4.16	1.05	4.95	0.78	1.73	0.2	1.45
