# Supplementary material for: Safety evaluation of four faba bean extracts used as dietary supplements in grass carp culture based on hematological indices, hepatopancreatic function and nutritional condition
Source: PeerJ. 2020 Jul 7;8:e9516. doi: 10.7717/peerj.9516 (PMC7350914; doi:10.7717/peerj.9516)
Supplement: Supplemental Information 2 [file peerj-08-9516-s002.xlsx]

## Sheet: raw data_Figure2
	GPT (mmol/L)		GOT (mmol/L)		AKP (U/L)		POD (mmol/L)
	50 d	100 d	50 d	100 d	50 d	100 d	50 d	100 d
Control_1	12.67	10	21	24	107.457	86.6082	53.1111	50.4444
Control_2	14.63	11	23	22	90.6523	95.643	55.8889	45.4444
Control_3	11.9	11.72	24	24	85.324	96.2654	57.6667	52.1111
FB_1	12	13.67	24	16	82.467	101.245	54.5556	42.8889
FB_2	11.8	10.01	20	18	96.254	91.6247	44.7778	41.5556
FB_3	13.86	11.2	22	16	88.3652	94.8425	53.1111	35.2222
FBA_1	25	35	25	26	100.317	208.702	47	59.7778
FBA_2	20	34.08	24	30	106.325	200.658	46.1111	60.3333
FBA_3	19	32.6	23	30	92.8461	195.364	51.8889	60.7778
FBW_1	18	11	26	30	96.4614	189.139	54.6667	71.1111
FBW_2	20.1	12.03	24	23	95.324	199.652	61.5556	87.6667
FBW_3	13.54	10.3	22	23	90.64	200.786	61.2222	88.3333
FBP_1	38.33	12.67	26	20	80.4678	202.133	83.6667	123
FBP_2	35	11.01	24	18	96.35	195.365	73.2222	121.222
FBP_3	36.5	12.38	22	16	86.495	197.638	76.4444	133.222
FBR_1	11.67	11.67	22	18	87.3262	93.6768	60.8889	56.1111
FBR_2	12.5	12.34	25	20	95.3214	95.954	63.6667	49
FBR_3	13	12.26	20	24	89.6547	116.355	54.7778	50.1111
