# Supplementary material for: Safety evaluation of four faba bean extracts used as dietary supplements in grass carp culture based on hematological indices, hepatopancreatic function and nutritional condition
Source: PeerJ. 2020 Jul 7;8:e9516. doi: 10.7717/peerj.9516 (PMC7350914; doi:10.7717/peerj.9516)
Supplement: Supplemental Information 3 [file peerj-08-9516-s003.xlsx]

## Sheet: raw data_Figure3
	TC (mmol/gprot)		TG (mmol/gprot)		AKP (U/gprot)		GOT (U/gprot)		GPT (U/gprot)		POD (U/mgprot)
	50 d	100 d	50 d	100 d	50 d	100 d	50 d	100 d	50 d	100 d	50 d	100 d
Control_1	0.0841347	0.494	0.173845	0.16667	682.617	573.52	2.101	1.102	0.742	0.771	4.153	3.416
Control_2	0.0705289	0.743	0.142465	0.186547	883.42	520.5	2.38	1.069	0.768	0.843	3.67	3.53
Control_3	0.0945674	0.484	0.130332	0.15326	683.45	531.76	2.784	1.29	0.886	0.647	4.3	5.34
FB_1	0.12367	1.741	0.373	0.77333	2309.89	940.574	1.7	0.469	0.985	0.81	5.513	2.47
FB_2	0.0832565	1.77	0.378353	0.796534	2354.86	863.4	1.3	0.388	1.085	0.81	6.47	2.98
FB_3	0.129741	1.926	0.312857	0.803646	2298.65	893.4	1.63	0.453	1.15	0.621	6.35	2.35
FBA_1	0.0979555	2.919	0.658	0.45667	1583.43	437.915	2.27	0.655	1.52	0.696	7.483	3.43
FBA_2	0.0802615	3.272	0.832766	0.386541	1536.7	463.7	2.13	0.869	1.85	0.729	6.45	2.38
FBA_3	0.0922486	3.891	0.670919	0.4652	1498.6	464.7	1.44	0.836	1.674	0.748	6.35	3.34
FBW_1	0.0745722	2.776	0.540235	0.19667	1043.04	455.248	2.88	0.849	0.997	0.503	3.74	4.86
FBW_2	0.0874944	3.257	0.52567	0.2365	863.4	456.75	2.68	0.911	1.188	0.823	3.75	5.32
FBW_3	0.0618063	2.85	0.511476	0.2365	963.5	423.45	2.06	1.12	1.288	0.853	3.24	5.03
FBP_1	0.13847	0.9	0.22833	0.24667	671.911	513.874	2.09	0.831	1.499	0.679	6.066	4.263
FBP_2	0.0784702	1.046	0.264583	0.2648	653.1	532.4	2.22	1.094	1.672	0.641	6.76	4.97
FBP_3	0.121412	1.16	0.26534	0.2365	536.4	565.45	2.05	0.856	1.545	0.472	6.85	5.21
FBR_1	0.0355857	2.355	0.402365	0.473652	376.229	912.025	1.75	0.723	1.797	0.934	6.233	5.45
FBR_2	0.0862271	2.168	0.412365	0.49658	536.4	934.56	2.18	0.626	1.411	1.23	6.76	5.34
FBR_3	0.0765804	2.391	0.398654	0.438655	453.1	865.4	1.99	0.488	1.3	0.866	6.31	5.01
