# Supplementary material for: Safety evaluation of four faba bean extracts used as dietary supplements in grass carp culture based on hematological indices, hepatopancreatic function and nutritional condition
Source: PeerJ. 2020 Jul 7;8:e9516. doi: 10.7717/peerj.9516 (PMC7350914; doi:10.7717/peerj.9516)
Supplement: Supplemental Information 4 [file peerj-08-9516-s004.xlsx]

## Sheet: Figure4
	SOD (U/mgprot)		NADPH (nmol/gprot)		NADP+ (nmol/gprot)		H2O2 (mmol/gprot)		T-GSH (umol/gprot)		GGSH (umol/gprot)
	50 d	100 d	50 d	100 d	50 d	100 d	50 d	100 d	50 d	100 d	50 d	100 d
Control_1	0.001133	0.001133	6.09	10.85	2.68	3.79	0.148	0.8887	200.31	154.25	220.6	142.62
Control_2	0.001134	0.001131	6.23	10.86	2.32	3.42	0.1359	0.9135	197.65	166.31	203.35	150.34
Control_3	0.001065	0.001299	6.27	10.34	2.46	3.44	0.1399	0.8961	193.25	159.76	190.34	140.72
FB_1	0.001567	0.0008	7.54	6.89	3.65	4.89	0.3973	0.69	212.63	329.85	153.81	198.16
FB_2	0.001544	0.000804	7.67	6.51	3.76	4.6	0.3484	0.6534	197.03	330.12	169.21	186.34
FB_3	0.001426	0.000793	7.43	6.6	3.75	4.76	0.3861	0.6834	209.64	329.44	153.42	176.34
FBA_1	0.001504	0.00082	4.56	7.54	1.35	3.24	0.66	0.6987	198.08	335.98	168	228.11
FBA_2	0.001646	0.0008	4.34	7.34	1.28	3.19	0.6325	0.6734	196.34	330.24	194.34	230.76
FBA_3	0.001502	0.000796	4.61	7.48	1.27	3.2	0.6731	0.6831	190.71	328.64	173.4	215.64
FBW_1	0.001267	0.000833	4.89	7.49	2.26	3.49	0.7017	0.9467	208.31	172.53	172.21	164.29
FBW_2	0.001204	0.00083	4.64	7.34	2.35	3.54	0.6912	0.8956	203.51	164.34	164.82	146.37
FBW_3	0.001165	0.00081	4.62	7.51	2.34	3.5	0.6365	0.9034	196.28	168.19	197.64	153.37
FBP_1	0.001296	0.00069	6.52	9.74	1.13	4.46	0.2207	0.4513	210.79	165.76	178.61	155.83
FBP_2	0.001301	0.0006	6.25	9.63	1.3	4.64	0.2153	0.4428	206	170.34	197.3	143.65
FBP_3	0.00123	0.000634	6.34	9.71	1.16	4.5	0.2031	0.4361	198.3	164.32	175.84	157.34
FBR_1	0.001301	0.000721	6.29	8.83	2.35	4.56	0.2923	0.4437	190.45	236.08	137.67	179.38
FBR_2	0.001345	0.00073	6.23	8.31	2.43	4.62	0.3021	0.4167	193.79	246.35	168.23	183.21
FBR_3	0.001367	0.000817	6.35	8.21	2.38	4.54	0.2864	0.4397	198.6	228.17	149.35	175.34
